# Supplementary material for: Identification and analysis of hub genes and networks related to hypoxia preconditioning in mice (No 035215)
Source: PubMed Central journal article supplement (PMC5844716; doi:10.18632/oncotarget.23555), 2017-12-21
Supplement: oncotarget-09-11889-s001.pdf [file oncotarget-09-11889-s001.pdf]

## Identification and analysis of hub genes and networks related to hypoxia preconditioning in mice

### SUPPLEMENTARY MATERIALS

**Supplementary Table 1: The significant functions of the 113 up-regulated differentially expressed genes.** See\_Supplementary\_Table 1

**Supplementary Table 2: The significant functions of the 138 down-regulated differentially expressed genes.** See\_Supplementary\_Table 2

**Supplementary Table 3: Nineteen of the up-regulated significant signaling pathways of the differentially expressed genes involved in HPC mice**

| Path id | Path name                                             | p-value   | FDR value | Enrichment |
|---------|-------------------------------------------------------|-----------|-----------|------------|
| 4080    | Neuroactive ligand-receptor interaction               | 1.55E-12  | 6.49E-11  | 9.7600422  |
| 4020    | Calcium signaling pathway                             | 3.26E-06  | 6.85E-05  | 7.2030812  |
| 1100    | Metabolic pathways                                    | 4.89E-05  | 6.84E-04  | 2.675919   |
| 4010    | MAPK signaling pathway                                | 0.0002841 | 2.39E-03  | 4.7400922  |
| 562     | Inositol phosphate metabolism                         | 0.0010964 | 6.58E-03  | 10.686753  |
| 4810    | Regulation of actin cytoskeleton                      | 0.0020076 | 9.65E-03  | 4.5312775  |
| 565     | Ether lipid metabolism                                | 0.0026809 | 1.12E-02  | 13.775893  |
| 5014    | Amyotrophic lateral sclerosis (ALS)                   | 0.0027207 | 1.13E-02  | 8.3967347  |
| 564     | Glycerophospholipid metabolism                        | 0.0035119 | 1.27E-02  | 7.8369524  |
| 4070    | Phosphatidylinositol signaling system                 | 0.0042499 | 1.37E-02  | 7.4401447  |
| 600     | Sphingolipid metabolism                               | 0.0063119 | 1.74E-02  | 10.251827  |
| 4530    | Tight junction                                        | 0.0063321 | 1.75E-02  | 5.1021825  |
| 4144    | Endocytosis                                           | 0.007971  | 1.97E-02  | 4.0442988  |
| 770     | Pantothenate and CoA biosynthesis                     | 0.0091502 | 2.13E-02  | 19.592381  |
| 4340    | Hedgehog signaling pathway                            | 0.0126362 | 2.79E-02  | 8.0150649  |
| 4740    | Olfactory transduction                                | 0.0180672 | 3.70E-02  | 0.1494841  |
| 340     | Histidine metabolism                                  | 0.0249976 | 4.68E-02  | 11.755429  |
| 760     | Nicotinate and nicotinamide metabolism                | 0.0249976 | 4.68E-02  | 11.755429  |
| 563     | Glycosylphosphatidylinositol(GPI)-anchor biosynthesis | 0.02696   | 4.92E-02  | 11.303297  |

**Supplementary Table 4: Twenty-six of the down-regulated significant signaling pathways of the differentially expressed genes involved in HPC mice**

| Path id | Path name                                                  | <i>p</i> -value | FDR      | Enrichment |
|---------|------------------------------------------------------------|-----------------|----------|------------|
| 4020    | Calcium signaling pathway                                  | 1.27E-22        | 4.37E-21 | 14.181066  |
| 4080    | Neuroactive ligand-receptor interaction                    | 2.42E-19        | 4.16E-18 | 10.675046  |
| 4720    | Long-term potentiation                                     | 5.73E-10        | 4.93E-09 | 14.550669  |
| 4360    | Axon guidance                                              | 1.77E-08        | 1.22E-07 | 9.25       |
| 4310    | Wnt signaling pathway                                      | 9.86E-08        | 5.65E-07 | 7.9367284  |
| 4070    | Phosphatidylinositol signaling system                      | 1.60E-06        | 7.87E-06 | 10.850211  |
| 4540    | Gap junction                                               | 6.54E-06        | 2.81E-05 | 9.022807   |
| 561     | Glycerolipid metabolism                                    | 1.82E-05        | 6.62E-05 | 12.362981  |
| 4810    | Regulation of actin cytoskeleton                           | 2.25E-05        | 7.73E-05 | 5.1920888  |
| 4062    | Chemokine signaling pathway                                | 4.87E-05        | 0.000148 | 5.2781199  |
| 4260    | Cardiac muscle contraction                                 | 6.47E-05        | 0.000183 | 7.8949561  |
| 4270    | Vascular smooth muscle contraction                         | 8.17E-05        | 0.000216 | 6.3967662  |
| 4912    | GnRH signaling pathway                                     | 0.0001088       | 0.000267 | 7.2817557  |
| 4520    | Adherens junction                                          | 0.0002011       | 0.000461 | 8.1376582  |
| 230     | Purine metabolism                                          | 0.0005019       | 0.001079 | 4.9262452  |
| 4510    | Focal adhesion                                             | 0.0015847       | 0.002849 | 4.1409018  |
| 4730    | Long-term depression                                       | 0.0016776       | 0.002974 | 6.8683226  |
| 4370    | VEGF signaling pathway                                     | 0.0018815       | 0.003237 | 6.6966146  |
| 601     | Glycosphingolipid biosynthesis – lacto and neolacto series | 0.0028290       | 0.004636 | 13.393229  |
| 4740    | Olfactory transduction                                     | 0.0100608       | 0.013589 | 0.2179976  |
| 4115    | p53 signaling pathway                                      | 0.0113423       | 0.014857 | 5.6392544  |
| 4670    | Leukocyte transendothelial migration                       | 0.0118037       | 0.015296 | 4.3912227  |
| 4710    | Circadian rhythm – mammal                                  | 0.0146925       | 0.017838 | 15.306548  |
| 4650    | Natural killer cell mediated cytotoxicity                  | 0.0158370       | 0.018759 | 4.0895356  |
| 4662    | B cell receptor signaling pathway                          | 0.0167677       | 0.019475 | 5.0421569  |
| 604     | Glycosphingolipid biosynthesis – ganglio series            | 0.0191375       | 0.021243 | 13.393229  |
| 4012    | ErbB signaling pathway                                     | 0.0228182       | 0.023936 | 4.6084229  |
| 562     | Inositol phosphate metabolism                              | 0.0296356       | 0.029142 | 5.8443182  |
